# Supplementary material for: DiCoExpress: a tool to process multifactorial RNAseq experiments from quality controls to co-expression analysis through differential analysis based on contrasts inside GLM models
Source: PubMed Central journal article supplement (PMC7216733; doi:10.1186/s13007-020-00611-7), 2020-05-12

A

Total normalized counts per sample

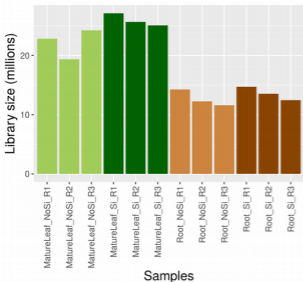

B

Boxplot of normalized counts

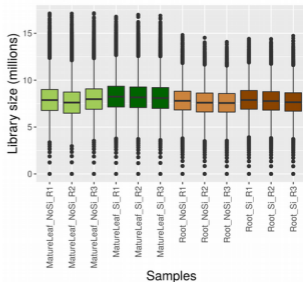

C

Heatmap of normalized counts [Euclidean dist, Ward link]

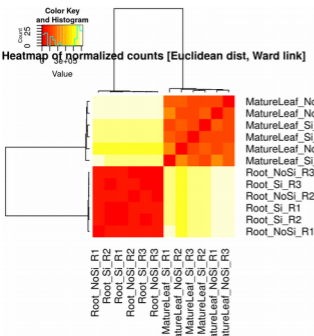

D

PCA on normalized counts

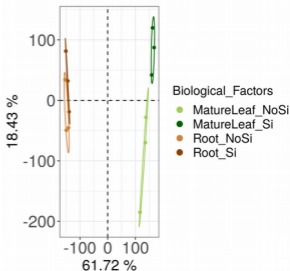

Supplement: 13007_2020_611_MOESM2_ESM.pdf [file 13007_2020_611_MOESM2_ESM.pdf]
