# Supplementary material for: DiCoExpress: a tool to process multifactorial RNAseq experiments from quality controls to co-expression analysis through differential analysis based on contrasts inside GLM models
Source: PubMed Central journal article supplement (PMC7216733; doi:10.1186/s13007-020-00611-7), 2020-05-12

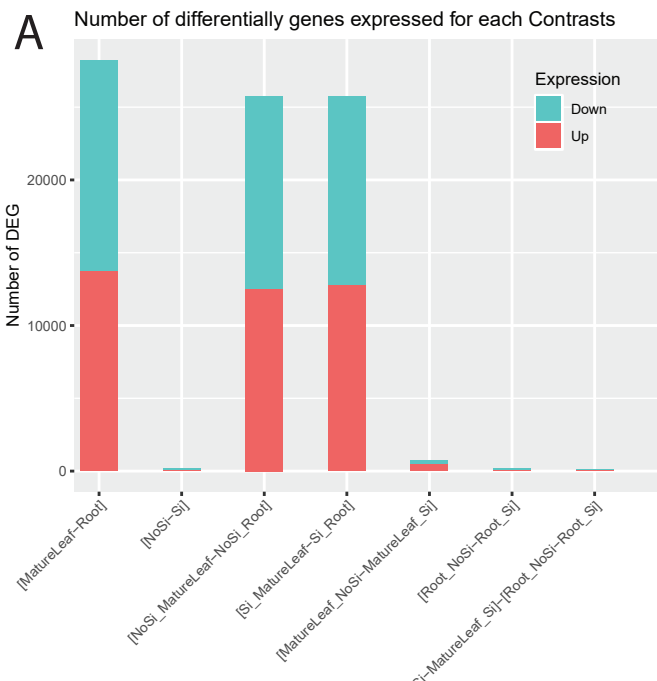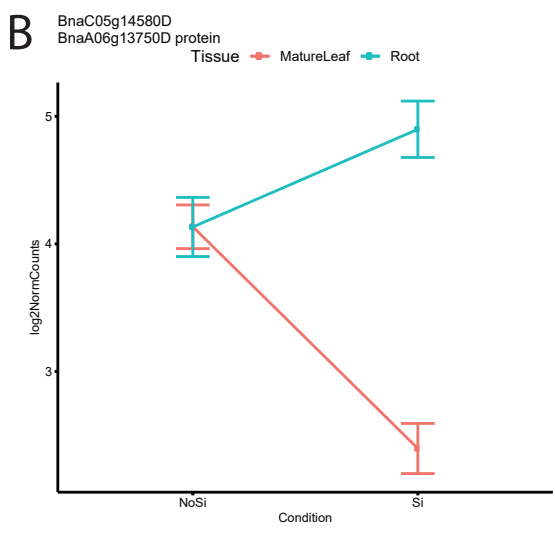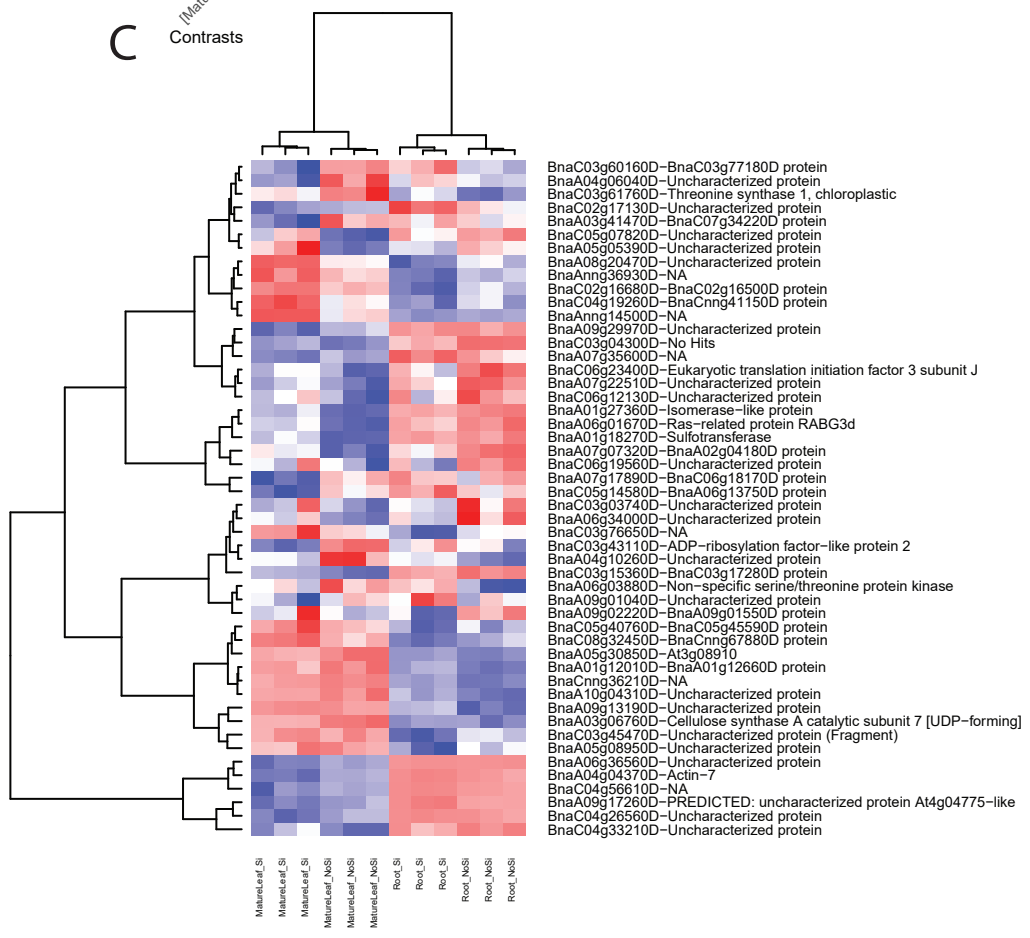

Supplement: 13007_2020_611_MOESM3_ESM.pdf [file 13007_2020_611_MOESM3_ESM.pdf]
