# Supplementary material for: DiCoExpress: a tool to process multifactorial RNAseq experiments from quality controls to co-expression analysis through differential analysis based on contrasts inside GLM models
Source: PubMed Central journal article supplement (PMC7216733; doi:10.1186/s13007-020-00611-7), 2020-05-12
Supplement: 13007_2020_611_MOESM6_ESM.pdf [file 13007_2020_611_MOESM6_ESM.pdf]

|                                  |              | <b>Groups of differentially expressed genes (Venn diagram)</b> |            |           |          |           |           |          |              |
|----------------------------------|--------------|----------------------------------------------------------------|------------|-----------|----------|-----------|-----------|----------|--------------|
| <b>Clusters of co-expression</b> |              | <b>a</b>                                                       | <b>b</b>   | <b>c</b>  | <b>d</b> | <b>e</b>  | <b>f</b>  | <b>g</b> | <b>Total</b> |
|                                  | <b>0</b>     | 1                                                              | 2          | 0         | 0        | 0         | 0         | 0        | <b>3</b>     |
|                                  | <b>1</b>     | 194                                                            | 0          | 0         | 0        | 9         | 0         | 0        | <b>203</b>   |
|                                  | <b>2</b>     | 41                                                             | 25         | 8         | 1        | 4         | 5         | 1        | <b>85</b>    |
|                                  | <b>3</b>     | 47                                                             | 12         | 2         | 1        | 1         | 8         | 0        | <b>71</b>    |
|                                  | <b>4</b>     | 112                                                            | 15         | 4         | 0        | 10        | 4         | 1        | <b>146</b>   |
|                                  | <b>5</b>     | 100                                                            | 13         | 4         | 0        | 10        | 3         | 0        | <b>130</b>   |
|                                  | <b>6</b>     | 105                                                            | 1          | 0         | 0        | 0         | 0         | 0        | <b>106</b>   |
|                                  | <b>7</b>     | 97                                                             | 72         | 5         | 0        | 18        | 8         | 1        | <b>201</b>   |
|                                  | <b>Total</b> | <b>697</b>                                                     | <b>140</b> | <b>23</b> | <b>2</b> | <b>52</b> | <b>28</b> | <b>3</b> | <b>945</b>   |
